# Supplementary material for: The organisational value of diagnostic strategies using high-sensitivity troponin for patients with possible acute coronary syndromes: a trial-based cost-effectiveness analysis
Source: PubMed Central journal article supplement — BMJ Open. 2017 Jun 9;7(6):e013653. doi: 10.1136/bmjopen-2016-013653 (PMC5577894; doi:10.1136/bmjopen-2016-013653), 2017-06-09
Supplement: bmjopen-2016-013653supp001.pdf [file bmjopen-2016-013653supp001.pdf]

**The organizational value of diagnostic strategies using high sensitivity troponin for patients with possible acute coronary syndromes: A trial-based cost-effectiveness analysis**  
**SUPPLEMENTARY ONLINE CONTENT**

**Contents**

|                                                                                                                                                                        |    |
|------------------------------------------------------------------------------------------------------------------------------------------------------------------------|----|
| Methods S1. Micro simulation model .....                                                                                                                               | 2  |
| Table S1. Patient selection criteria: Cost prediction model .....                                                                                                      | 5  |
| Table S2. Troponin statuses considered in the model.....                                                                                                               | 5  |
| Table S3. Patient selection criteria: Micro simulation model.....                                                                                                      | 5  |
| Table S4A. Model parameter and assumptions: Objective testing probabilities. ....                                                                                      | 6  |
| Table S4B. Model parameter and assumptions: Probabilities for angiography. ....                                                                                        | 6  |
| Table S4C. Model parameter and assumptions: Cardiac workup duration.....                                                                                               | 7  |
| Table S4D. Model parameter and assumptions: Hospital length of stay .....                                                                                              | 7  |
| Table S5. Patient characteristics of the selected and generated model cohort.....                                                                                      | 8  |
| Table S6. Cost prediction model regression analysis.....                                                                                                               | 9  |
| Table S7. Risk assignment of patients.....                                                                                                                             | 10 |
| Table S8. Troponin status by assay used .....                                                                                                                          | 10 |
| Table S9. Total length of stay and costs per strategy and final diagnosis .....                                                                                        | 11 |
| Table S10A. Emergency department performance by strategy .....                                                                                                         | 12 |
| Table S10B. Short Stay Unit times per patient by strategy .....                                                                                                        | 12 |
| Figure S1. Risk stratification and process of care for possible acute coronary syndrome .....                                                                          | 13 |
| Figure S2A-B. Comparison of actual vs. predicted costs .....                                                                                                           | 14 |
| Figure S3. Simulated troponin protocol times (A), patient arrival times, and times of final results for sensitive troponin I and highly sensitive troponin I (B). .... | 15 |
| Figure S4A-C. Histograms of Short Stay Unit times for different strategies.....                                                                                        | 15 |
| Figure S5. Incremental cost and effectiveness of Strategy 2 (hsTnI) vs. Strategy 1 (cTnI, usual care)....                                                              | 16 |
| Table S11. Comparison of results from single and multiple run micro simulations.....                                                                                   | 16 |
| Figure S6A. Mean costs based on number of samples in the micro simulation.....                                                                                         | 17 |
| Figure S6B. Incremental costs based on different number of samples in the micro simulation.....                                                                        | 17 |
| Figure S7. Impact of protocol time on costs .....                                                                                                                      | 18 |
| Figure S8. Impact of threshold time for discharge on costs .....                                                                                                       | 18 |
| Figure S9. Cost variation as a result of the sampling strategy illustrated for ten selected individuals...                                                             | 19 |

## **Methods S1. Micro simulation model**

### *Troponin testing*

After blood was drawn, samples for hsTnI testing were immediately centrifuged. Serum and EDTA plasma were separated and stored frozen at -80°C, within two hours. During March and April, 2012, previously unfrozen samples were thawed, mixed, and centrifuged prior to analysis. The assay used was the final pre-commercial release version of the ARCHITECT High Sensitive STAT Troponin-I assay (Abbott Laboratories, Abbott Park, IL). The hsTnI assay has a 99th percentile concentration of 26.2ng/L with a corresponding co-efficient of variation of <5% and a limit of detection of 1.2ng/L. [1] Long-term stability of TnI has been demonstrated previously. [2]

### *Cost prediction model*

In alignment with the study focus, activities that were available by patient were limited to the risk assessment and stratification period (ECG, stress test, troponin testing, MPS, CTCA, angiography, etc.). Information about inpatient treatment and management other than inpatient time were not available. Thus, the prediction of total costs based on the available data was expected to be biased with increasing inpatient time. In fact, the average costs per inpatient day decreased with increasing stay until a slight increase appeared for patients staying more than 15 days. This was regarded as an indicator for costs accrued from activities not captured in the collected data. By further analyzing the data, we excluded 2.5% of patients with an inpatient stay of more than 12 days, as this was the maximum length of stay threshold that did not affect quartiles, median, and the 95th percentile of the cost distribution of the original data, but also excluded effects of unknown inpatient activities from the prediction model.

### *Patient pathway*

Patients were classified into risk groups according to the Queensland chest pain pathway (eFigure 1).[3] Low-risk patients were treated in the ED; intermediate-risk patients were managed in the ED with admission to the ED short-stay unit. High-risk patients were referred to inpatient cardiology. Patients requiring CABG were transferred to another institution.

### *Health economic model*

The model distinguished five troponin statuses (eTable 2). On a positive troponin status, patients were referred to inpatient cardiology. Patients with a negative troponin status underwent further testing for coronary ischemia.

Further testing included the evaluation of the troponin status after the second test and additional objective testing (exercise stress test, myocardial perfusion scan, stress echocardiography, computed tomography coronary angiography or angiography). If objective testing was negative, patients were eligible for discharge from the chest pain pathway and exit the model. If objective testing or troponin results were positive, patients were referred for acute coronary syndrome (ACS) management in the inpatient ward.

In the accelerated diagnostic protocol (ADP) scenarios, patients meeting the Modified 2-hour Accelerated Diagnostic Protocol to Assess Patients with Chest Pain Symptoms Using Contemporary Troponins as the Only Biomarker trial (ADAPT) criteria for low risk patients (thrombolysis in myocardial infarction (TIMI) score  $\leq 1$  and hsTnI  $\leq$  upper limit of normal (ULN)) were discharged and exited the model without further testing and workup.

Diagnosis was compared to the final adjudicated 30-days diagnosis for calculating the diagnostic accuracy. A follow-up event within 30 days was assumed for individuals ruled-out by the respective strategy, and a reported 30-days clinical outcome of ACS (False-negative patients).

Occurrences and results of workup testing per individual were randomly sampled from binomial distributions on the basis of the troponin status using actual probabilities derived from the study cohort. Duration of workup was analyzed from the model cohort and transformed into statistical distributions. Times were randomly sampled from these distributions individually during simulation. To reflect the heterogeneity of hospital stay, LOS data of the model cohort were analyzed by final diagnosis (ACS, Non-ACS) and electrocardiogram status (normal, ischemic, abnormal).

Hospital LOS times were randomly sampled per individual from distributions with values limited between the observed minimum and maximum of the cohort. Inpatient stay was calculated by deducting all inpatient activities from the sampled LOS times. Inpatient time was only considered for individuals that were referred to ACS management. All next day discharges were counted as overnight stays.

Regression coefficients for predicting index costs were randomly sampled per individual case with a uniform distribution between the lower and upper bound of the 95% confidence interval. Follow up cost data were estimated by assuming that the patient was admitted to cardiology for angiography with an emergency department-LOS of one hour, 3 inpatient days, no exercise stress test, no myocardial perfusion scan, no computed tomography coronary angiography, and no echocardiography. Follow-up costs were assigned by randomly sampling from a uniform distribution between the upper and lower limit of the 95% CI of the predicated costs of this scenario (\$5402-\$8628).

The appropriate number of samples was estimated by conducting several pilot runs estimating the effect size. A reasonable distinction between confidence intervals for costs, an acceptable consistency between multiple run (n=5) and single run results, and a between-run variability of below 10% were used as criteria.[4] We regarded the latter as particularly important since it would allow for meaningful comparisons between different scenarios, settings and assumptions in subsequent evaluations. Based on results of the pilot runs (eFigure 6A-B) the sample size was set to 40,000 patients.

For the probabilistic sensitivity analysis Strategy-2 was compared against Strategy-1 by repeating the micro simulation 250 times with 40,000 patients each. Mean results and 95% confidence intervals for costs, referral accuracy, and diagnostic accuracy were compared to the micro simulation results (eFigure 5; eTable 11).

The impact of protocol time on costs was tested by running Strategy-2 and assuming constant troponin values and increasing but fixed protocol times. Variation in the discharge threshold between 6pm and 10pm were tested and compared to a scenario with no daytime restriction for discharge. Both analyses were done by sampling 40,000 individuals in 5 independent runs.

Model was developed in TreeAge Pro 2015, R1.0 (TreeAge Software, Williamstown, MA, USA). Statistical analyses were done in Minitab 16.1.0. A significance level of 0.05 was used in all analyses. Continuous data were analyzed conducting a 2-Sample t-test and Mann-Whitney test. For categorical data Fisher's exact test was used.

#### *Additional information*

By randomly sampling from the database, each of the 719 individual patients was sampled on average 55 to 56 times (Range 36 – 78). Each sample of a patient was consistent in age, sex, characteristics, ACS status and troponin values, but varied in terms of arrival time, protocol time, treatment times, additional cardiac testing if required, total inpatient LOS if referred for ACS management, and costs predictors. This generated a huge cohort of patients that reflected variation and heterogeneity in decision making, severity, and management. The result of the sampling approach is demonstrated in eFigure 9 which shows distribution of costs of the first 10 individuals as an example. Given the fact that cardiac testing such as exercise stress testing or myocardial perfusion scanning could potentially lead to positive results in patients with negative ACS condition (eTable 4A) some repetitions generated positive workup results that led to ACS management referrals (Italic numbers in eFigure 9). The inpatient stay after stratification and workup was by assumption only considered for patients referred to ACS management. Therefore, the observed variation in costs for patients referred to ACS management is mainly driven by variation in length of stay reflecting different treatments, underlying diseases, severity or management decisions. There was a potential risk that this variation would superimpose the focus of the study to evaluate different assessment strategies.

In line with a long-term perspective, previous research did not consider short term effects for hospitals or variation in troponin protocol time.[5-9] This model used a distribution around the recommended target derived from actual data reflecting a more realistic scenario (eFigure 3A).

eFigure 4 provides histograms of SSU times. The majority of patients were admitted to short stay unit (65% with short stay unit time > 0hrs, eFigure 4A); in the standard strategy utilizing cTnI some patients were managed around a mean of 7.5 hours, some required additional observation with a mean of 25.0 hours indicating

overnight stays. Replacing cTnI with hsTnI resulted in a substantial shift to lower short stay unit times as shown by mean values of 4.0 hours and 22.5 hours for those staying overnight (eFigure 4B). An additional direct rule-out strategy (limit of detection, LoD) decreased the number of short stay unit admissions significantly as indicated by an increased proportion of patients at 0h in eFigure 4B. As illustrated in eFigure 4C accelerated rule-out protocols for low risk patients (ADP) moved the SSU time distribution to distinctly lower values.

Testing the influence of different protocol times revealed that protocols with lower time targets would be less affected by variation and delays (eFigure 7). As a practical consequence, accelerated algorithms could be expected to result in more stable and more predictable emergency department processes, thus allowing for better management and resource allocation.

Patients may not be discharged immediately even if they are regarded as low risk. Prolonged protocol times could cause some clinically unnecessary overnight stays at the hospital's expense. We used the discharge threshold time to reflect such specific management rules. Since the threshold may not be fixed in real life we tested the impact of some flexibility. Data in eFigure 8 reveal no significant observable effect of a flexible threshold time on Strategy 2 (hsTnI) whereas Strategy 1 (cTnI, standard care) was strongly affected between 6 and 8pm. Although these findings depend on emergency department arrival pattern results suggested that hsTnI enabled algorithms would be less affected by variation. Given the fact that arrival pattern used in the model was derived from actual data accelerated protocols would likely lead to more stable and predictable emergency department processes.

**Table S1. Patient selection criteria: Cost prediction model**

| Criteria                                                          | Excluded | N   |
|-------------------------------------------------------------------|----------|-----|
| All data                                                          |          | 938 |
| Exclude patients with CABG*                                       | -14      | 924 |
| Exclude long-stay outliers >12d (incl. non-cardiac complications) | -23      | 901 |
| Exclude inconsistent or missing data                              | -6       | 895 |
| Analyze extreme outliers                                          | -4       | 891 |

\*Patients receiving coronary bypass surgery (CABG) were excluded for the cost prediction model. Costs were unknown as patients were transferred to another hospital for surgery.  
CABG=Coronary artery bypass graft

**Table S2. Troponin statuses considered in the model**

| Status | Description                                                                           | Evaluation for ACS |
|--------|---------------------------------------------------------------------------------------|--------------------|
| 1      | 1 <sup>st</sup> troponin & 2 <sup>nd</sup> troponin ≤ ULN                             | Negative           |
| 2      | 1 <sup>st</sup> troponin ≤ ULN & 2 <sup>nd</sup> troponin > ULN                       | Positive           |
| 3      | 1 <sup>st</sup> troponin > ULN & 2 <sup>nd</sup> troponin ≤ ULN                       | Positive           |
| 4      | 1 <sup>st</sup> troponin & 2 <sup>nd</sup> troponin > ULN; difference < delta cut-off | Negative (Stable)  |
| 5      | 1 <sup>st</sup> troponin & 2 <sup>nd</sup> troponin > ULN; difference ≥ delta cut-off | Positive           |

ULN=Upper limit of normal, 99<sup>th</sup> percentile of the reference population; ACS=Acute coronary syndrome

**Table S3. Patient selection criteria: Micro simulation model**

| Minimum required dataset  | Excluded | N   |
|---------------------------|----------|-----|
| Basic characteristics     | 0        | 938 |
| Time points stated        | 0        | 938 |
| ECG information available | 0        | 938 |
| Baseline cTnI             | 0        | 928 |
| Baseline hsTnI            | -145     | 793 |
| Second cTn (6hrs)         | -57      | 736 |
| Second hsTnI (2hrs)       | -17      | 719 |
| Final endpoint            | 0        | 719 |

Individuals with missing data in the minimum required dataset were excluded from the analysis.  
ECG=echocardiogram, cTnI=sensitive cardiac troponin I, hsTnI=highly sensitive cardiac troponin I

**Table S4A. Model parameter and assumptions: Objective testing probabilities.**

| Workup                                   | Troponin status | N   | Occurrence | Result +/-ve       |
|------------------------------------------|-----------------|-----|------------|--------------------|
| Exercise Stress Test                     | 1               | 582 | 60.1%      | 5.4%               |
|                                          | 2               | 31  | 29.0%      | 11.1%              |
|                                          | 3               | 15  | 33.3%      | 20.0%              |
|                                          | 4               | 40  | 12.5%      | 40.0%              |
|                                          | 5               | 51  | 2.0%       | 0.0%               |
| Myocardial perfusion scan                | 1               | 582 | 14.3%      | 18.1%              |
|                                          | 2               | 31  | 12.9%      | 75.0%              |
|                                          | 3               | 15  | 20.0%      | 33.3%              |
|                                          | 4               | 40  | 7.5%       | 0.0%               |
|                                          | 5               | 51  | 2.0%       | 0.0%               |
| Echocardiography                         | 1               | 582 | 17.0%      | data not available |
|                                          | 2               | 31  | 48.4%      |                    |
|                                          | 3               | 15  | 20.0%      |                    |
|                                          | 4               | 40  | 50.0%      |                    |
|                                          | 5               | 51  | 70.6%      |                    |
| Computed tomography coronary angiography | 1               | 582 | 3.1%       | data not available |
|                                          | 2               | 31  | 0.0%       |                    |
|                                          | 3               | 15  | 6.7%       |                    |
|                                          | 4               | 40  | 5.0%       |                    |
|                                          | 5               | 51  | 0.0%       |                    |

Statistical evaluation of the model cohort (N=719)

**Table S4B. Model parameter and assumptions: Probabilities for angiography.**

| Workup      | Troponin status | N   | Occurrence | Result +ve (ACS patients) | Result +ve (non-ACS patients) |
|-------------|-----------------|-----|------------|---------------------------|-------------------------------|
| Angiography | 1               | 582 | 11.9%      | 50.0%                     | 31.3%                         |
|             | 2               | 31  | 35.5%      | 100.0%                    | 0.0%                          |
|             | 3               | 15  | 13.3%      | 0.0%                      | 0.0%                          |
|             | 4               | 40  | 27.5%      | 83.3%                     | 40.0%                         |
|             | 5               | 51  | 70.6%      | 96.8%                     | 20.0%                         |

Statistical evaluation of the model cohort (N=719)

ACS=Acute coronary syndrome

**Table S4C. Model parameter and assumptions: Cardiac workup duration**

| Variable                                                            | Mean time, hours | Distribution |
|---------------------------------------------------------------------|------------------|--------------|
| Arrival time (decimal time format)                                  | 0.45             | Normal       |
| Initial assessment time                                             | 0.45             | Gamma        |
| Protocol time cTnI                                                  | 6.3              | Gamma        |
| Protocol time hsTnI                                                 | 2.3              | Gamma        |
| Workup time (2 <sup>nd</sup> Tn after 6.30pm)                       | 17.1             | Gamma        |
| Probability of short workup time (2 <sup>nd</sup> Tn before 6.30pm) | 0.79             | Binomial     |
| Workup time (short; 2 <sup>nd</sup> Tn before 6.30pm)               | 1.78             | Gamma        |
| Workup time (long; 2 <sup>nd</sup> Tn before 6.30pm)                | 20.3             | Gamma        |
| Angiography                                                         | 3.0              | Gamma        |

cTnI=sensitive cardiac troponin I; hsTnI=highly sensitive cardiac troponin I

**Table S4D. Model parameter and assumptions: Hospital length of stay**

| Hospital LOS, hours    | Mean  | SD   | Q1   | Median | Q3    | Min  | Max   | Distribution |
|------------------------|-------|------|------|--------|-------|------|-------|--------------|
| ACS / ECG normal       | 154.4 | 99.6 | 66.5 | 100.6  | 273.4 | 48.7 | 280.4 | Gamma        |
| ACS / ECG ischemic     | 125.4 | 87.6 | 56.7 | 92.8   | 209.6 | 20.5 | 288.0 | Gamma        |
| ACS / ECG abnormal     | 110.3 | 81.5 | 59.3 | 85.5   | 166.0 | 15.8 | 283.9 | Gamma        |
| Non-ACS / ECG normal   | 33.1  | 49.7 | 6.0  | 19.6   | 27.6  | 0.0  | 284.0 | Gamma        |
| Non-ACS / ECG ischemic | 91.9  | 90.5 | 25.0 | 64.7   | 121.3 | 0.0  | 284.0 | Gamma        |
| Non-ACS / ECG abnormal | 58.9  | 71.7 | 8.0  | 25.3   | 80.5  | 0.0  | 282.4 | Gamma        |

Statistical evaluation of the model cohort (N=719)

LOS=length of stay; ACS=acute coronary syndrome; ECG=electrocardiogram

**Table S5. Patient characteristics of the selected and generated model cohort**

| Demographics                                    | Cohort<br>(N = 719) | Generated cohort <sup>a</sup><br>(N = 40,000)               | p-value |      |
|-------------------------------------------------|---------------------|-------------------------------------------------------------|---------|------|
| Sex (% women)                                   | 39.4                | 39.5                                                        | 0.94    |      |
| Age, yrs. Mean (Range)                          | 55 (19 - 97)        | 55 (19-97)                                                  | 0.94    |      |
| <b>Risk factors</b>                             |                     |                                                             |         |      |
| Dyslipidaemia, %                                | 42.1                | Sampled and used for<br>estimating the<br>assessment status |         |      |
| Diabetes, %                                     | 12.8                |                                                             |         |      |
| Hypertension, %                                 | 43.3                |                                                             |         |      |
| Tachycardia, %                                  | 1.7                 |                                                             |         |      |
| Obesity (BMI>30), %                             | 35.5                |                                                             |         |      |
| Smoking, %                                      | 26.8                |                                                             |         |      |
| <b>Medical History</b>                          |                     |                                                             |         |      |
| Angina, %                                       | 22.5                | Sampled and used for<br>estimating the<br>assessment status |         |      |
| Coronary artery disease, %                      | 20.5                |                                                             |         |      |
| Myocardial infarction, %                        | 16.3                |                                                             |         |      |
| Family coronary artery disease, %               | 46.6                |                                                             |         |      |
| Arrhythmia, %                                   | 9.0                 |                                                             |         |      |
| Congestive heart failure, %                     | 4.2                 |                                                             |         |      |
| CABG surgery, %                                 | 6.5                 |                                                             |         |      |
| Prior angioplasty, %                            | 10.3                |                                                             |         |      |
| Peripheral artery disease, %                    | 1.8                 |                                                             |         |      |
| Aspirin use, %                                  | 25.3                |                                                             |         |      |
| Stroke, %                                       | 9.0                 |                                                             |         |      |
| <b>Initial assessment &amp; final diagnosis</b> |                     |                                                             |         |      |
| ACS, %                                          | 11.0                |                                                             | 11.0    | 1.00 |
| ECG normal, %                                   | 49.5                |                                                             | 49.1    | 0.85 |
| ECG ischemic, %                                 | 7.8                 | 7.7                                                         | 0.94    |      |
| ECG abnormal, %                                 | 42.7                | 43.2                                                        | 0.82    |      |
| TIMI 0, %                                       | 24.5                | 25.0                                                        | 0.75    |      |
| TIMI 1, %                                       | 33.0                | 33.9                                                        | 0.61    |      |
| TIMI 2, %                                       | 17.9                | 17.2                                                        | 0.58    |      |
| TIMI 3, %                                       | 12.2                | 12.1                                                        | 0.86    |      |
| TIMI 4, %                                       | 6.4                 | 6.5                                                         | 1.00    |      |
| TIMI ≥5, %                                      | 6.0                 | 5.4                                                         | 0.51    |      |
| High risk, %                                    | 33.7                | 33.5                                                        | 0.94    |      |
| Intermediate risk, %                            | 65.1                | 65.3                                                        | 0.94    |      |
| Low risk, %                                     | 1.3                 | 1.3                                                         | 1.00    |      |
| Baseline cTnI, ng/L (Mean, range)               | 118 (10 - 31000)    | 119 (10 - 31000)                                            | 0.97    |      |
| Baseline hsTnI, ng/L (Mean, Range)              | 117.5 (0.3 - 38685) | 119.2 (0.3 - 38685)                                         | 0.98    |      |
| hsTnI < LoD at baseline <sup>b</sup> , %        | 5.1                 | 6.1                                                         | 0.34    |      |

TIMI and risk assignment based on standard strategy

<sup>a</sup> Samples per individuals: Mean 55.6; Range 36-78; Mode: 52.

<sup>b</sup> Limit of detection for hsTnI 1.2ng/L

BMI=Body mass index; CABG=coronary artery bypass graft; ACS=acute coronary syndrome; ECG=electrocardiogram; TIMI=Thrombolysis in myocardial infarction; cTnI=sensitive cardiac troponin I; hsTnI=highly sensitive cardiac troponin I, LoD=limit of detection



**Table S6. Cost prediction model regression analysis**

| Term                                     | Coef  | SE Coeff | T     | P-value | (95% CI)        | VIF  |
|------------------------------------------|-------|----------|-------|---------|-----------------|------|
| Constant                                 | 3.57  | 0.04     | 101.5 | <0.001  | (3.51 – 3.64)   |      |
| ED time, hours                           | 0.02  | 0.00     | 8.8   | <0.001  | (0.02 – 0.03)   | 1.15 |
| Inpatient stay, days                     | 0.19  | 0.01     | 37.7  | <0.001  | (0.18 – 0.20)   | 1.78 |
| Exercise stress test                     | -0.09 | 0.02     | -4.3  | <0.001  | (-0.13 – -0.05) | 1.37 |
| Myocardial perfusion scan                | 0.25  | 0.04     | 6.7   | <0.001  | (0.18 – 0.32)   | 1.22 |
| Computed tomography coronary angiography | 0.27  | 0.07     | 4.0   | <0.001  | (0.14 – 0.40)   | 1.02 |
| Angiography                              | 0.65  | 0.03     | 21.8  | <0.001  | (0.59 – 0.71)   | 1.34 |
| Echocardiography                         | 0.32  | 0.03     | 11.4  | <0.001  | (0.26 – 0.37)   | 1.49 |
| Admission                                | 0.39  | 0.03     | 11.6  | <0.001  | (0.33 – 0.46)   | 1.21 |

VIF: Variance inflation factor

Box-Cox transformation with Lambda= 0.189 (95%CI 0.135 – 0.245)

|                   |       |
|-------------------|-------|
| <b>S</b>          | 0.264 |
| <b>PRESS</b>      | 63.4  |
| <b>R-Sq</b>       | 88.3% |
| <b>R-Sq(adj)</b>  | 88.2% |
| <b>R-Sq(pred)</b> | 88.0% |

Admission considers admission to short-stay unit or inpatient ward

**Table S7. Risk assignment of patients**

| Strategy                                                                            |                                   |        | Initial risk assignment, % |                   |           |
|-------------------------------------------------------------------------------------|-----------------------------------|--------|----------------------------|-------------------|-----------|
|                                                                                     |                                   |        | Low-risk                   | Intermediate-risk | High-risk |
| Standard                                                                            |                                   |        | 1.3                        | 65.3              | 33.5      |
| hsTnI                                                                               |                                   |        | 1.3                        | 65.3              | 33.5      |
| Direct rule-out if baseline hsTnI < LoD (LoD)                                       | No direct rule-out                | All    | 1.3                        | 60.4              | 32.3      |
|                                                                                     | Direct rule-out <sup>a</sup>      | All    | 0.0                        | 4.9               | 1.2       |
|                                                                                     |                                   | ACS    | 0.0                        | 0.0               | 0.0       |
|                                                                                     |                                   | No ACS | 0.0                        | 4.9               | 1.2       |
| Accelerated rule-out if hsTnI values below the diagnostic cut-off and TIMI ≤1 (ADP) | No accelerated rule-out           | All    | 0.5                        | 16.4              | 33.5      |
|                                                                                     | Accelerated rule-out <sup>a</sup> | All    | 0.7                        | 48.8              | 0.0       |
|                                                                                     |                                   | ACS    | 0.0                        | 0.2               | 0.0       |
|                                                                                     |                                   | No ACS | 0.7                        | 48.7              | 0.0       |
| Direct rule-in if baseline hsTnI >52ng/L                                            | No direct rule-in                 | All    | 1.3                        | 65.3              | 26.3      |
|                                                                                     | Direct rule-in <sup>b</sup>       | All    | 0.0                        | 0.0               | 7.2       |
|                                                                                     |                                   | ACS    | 0.0                        | 0.0               | 5.1       |
|                                                                                     |                                   | No ACS | 0.0                        | 0.0               | 2.0       |

LoD=Limit of detection; ACS= Acute coronary syndrome;

TIMI=Thrombolysis in myocardial infarction;

ADP=Accelerated diagnostic protocol;

hsTnI=highly sensitive cardiac troponin I

<sup>a</sup> classified as low-risk

<sup>b</sup> classified as high-risk

**Table S8. Troponin status by assay used**

| cTnI                  | hsTnI       |            |             | Sum (cTnI), % |
|-----------------------|-------------|------------|-------------|---------------|
|                       | Negative, % | Stable, %  | Positive, % |               |
| Negative, %           | 84.0        | 0.1        | 0.3         | 84.4          |
| Stable, %             | 0.6         | 0.3        | 2.9         | 3.4           |
| Positive, %           | 2.4         | 0.6        | 9.0         | 11.9          |
| <b>Sum (hsTnI), %</b> | <b>86.9</b> | <b>1.0</b> | <b>12.1</b> | <b>100.0</b>  |

Troponin status interpretation according to eTable3

cTnI=sensitive cardiac troponin I; hsTnI=highly sensitive cardiac TnI

**Table S9. Total length of stay and costs per strategy and final diagnosis**

| Strategy | Category | Total costs, \$ |                      |                   |                      | Total LOSs, hours |                     |                   |                      |
|----------|----------|-----------------|----------------------|-------------------|----------------------|-------------------|---------------------|-------------------|----------------------|
|          |          | Median          | (25th - 75th perc)   | Mean              | (95% CI)             | Median            | (25th - 75th perc)  | Mean              | (95% CI)             |
| 1        | All      | <b>2135</b>     | <b>(1741 - 3109)</b> | <b>3267</b>       | <b>(3236 - 3297)</b> | <b>22.6</b>       | <b>(8.7 - 29.8)</b> | <b>34.0</b>       | <b>(33.6 - 34.4)</b> |
|          | No ACS   | 2022            | (1708 - 2669)        | 2570              | (2550 - 2590)        | 21.3              | (8.6 - 27.7)        | 27.2              | (26.9 - 27.5)        |
|          | ACS      | 8421            | (5863 - 10248)       | 8895              | (8756 - 9034)        | 74.8              | (25.5 - 137)        | 89.2              | (87 - 91.3)          |
| 2        | All      | <b>1983</b>     | <b>(1597 - 2951)</b> | <b>3134</b>       | <b>(3103 - 3165)</b> | <b>6.0</b>        | <b>(4.4 - 25.3)</b> | <b>27.8</b>       | <b>(27.4 - 28.2)</b> |
|          | No ACS   | 1860            | (1567 - 2478)        | 2417 <sup>a</sup> | (2397 - 2436)        | 5.6               | (4.3 - 23.1)        | 20.2 <sup>a</sup> | (19.8 - 20.5)        |
|          | ACS      | 8269            | (5827 - 10210)       | 8930              | (8788 - 9073)        | 79.0              | (23 - 139.2)        | 89.6              | (87.4 - 91.8)        |
| 3        | All      | <b>1921</b>     | <b>(1548 - 2878)</b> | <b>3057</b>       | <b>(3026 - 3088)</b> | <b>3.6</b>        | <b>(2.7 - 10.1)</b> | <b>20.4</b>       | <b>(20 - 20.9)</b>   |
|          | No ACS   | 1805            | (1517 - 2427)        | 2330 <sup>a</sup> | (2310 - 2350)        | 3.3               | (2.6 - 5.4)         | 11.9 <sup>a</sup> | (11.6 - 12.2)        |
|          | ACS      | 8269            | (5827 - 10210)       | 8930              | (8788 - 9073)        | 78.7              | (22.8 - 139.1)      | 89.3              | (87.1 - 91.5)        |
| 4        | All      | <b>1695</b>     | <b>(1560 - 2260)</b> | <b>2834</b>       | <b>(2804 - 2864)</b> | <b>5.6</b>        | <b>(4.2 - 24.8)</b> | <b>26.8</b>       | <b>(26.4 - 27.3)</b> |
|          | No ACS   | 1663            | (1544 - 1862)        | 2079 <sup>a</sup> | (2062 - 2096)        | 5.3               | (4.1 - 22.6)        | 19.0 <sup>a</sup> | (18.7 - 19.4)        |
|          | ACS      | 8268            | (5851 - 10198)       | 8932              | (8790 - 9074)        | 79.0              | (23 - 139.2)        | 89.6              | (87.4 - 91.8)        |
| 5        | All      | <b>1681</b>     | <b>(1532 - 2231)</b> | <b>2781</b>       | <b>(2751 - 2811)</b> | <b>3.5</b>        | <b>(2.6 - 8.3)</b>  | <b>20.1</b>       | <b>(19.6 - 20.5)</b> |
|          | No ACS   | 1648            | (1514 - 1845)        | 2020 <sup>a</sup> | (2002 - 2037)        | 3.2               | (2.5 - 5.2)         | 11.5 <sup>a</sup> | (11.2 - 11.8)        |
|          | ACS      | 8268            | (5851 - 10198)       | 8932              | (8790 - 9074)        | 78.7              | (22.8 - 139.1)      | 89.3              | (87.1 - 91.5)        |
| 6        | All      | <b>1681</b>     | <b>(1532 - 2230)</b> | <b>2776</b>       | <b>(2746 - 2807)</b> | <b>3.5</b>        | <b>(2.6 - 8.8)</b>  | <b>20.4</b>       | <b>(19.9 - 20.8)</b> |
|          | No ACS   | 1648            | (1514 - 1845)        | 2020 <sup>a</sup> | (2003 - 2037)        | 3.2               | (2.5 - 5.2)         | 11.5 <sup>a</sup> | (11.2 - 11.8)        |
|          | ACS      | 8151            | (5702 - 10194)       | 8885              | (8740 - 9029)        | 82.0              | (24.8 - 140.5)      | 91.9              | (89.7 - 94.1)        |

Strategy code: (1) Standard, (2) hsTnI, (3) hsTnI+LoD, (4) hsTnI+ADP, (5) hsTnI+LoD+ADP, (6) hsTnI+LoD+ADP+Rule in.

Total costs include index costs and 30 days follow-up costs.

All costs stated are in Australian dollars.

<sup>a</sup> p-value vs. Standard < 0.001

ACS=Acute coronary syndrome; hsTnI=highly sensitive troponin I; LoD=limit of detection; ADP=accelerated diagnostic protocol; LOS=Length of stay

**Table S10A. Emergency department performance by strategy**

| Emergency department time, hours | Mean | (95% CI)      | Median | (25th - 75th perc) | 97.5 <sup>th</sup> perc | ≤4hrs |
|----------------------------------|------|---------------|--------|--------------------|-------------------------|-------|
| 1) Standard                      | 0.68 | (0.66 - 0.7)  | 0.41   | (0.26 - 0.63)      | 1.4                     | 98.7% |
| 2) hsTnl                         | 0.58 | (0.57 - 0.6)  | 0.41   | (0.26 - 0.63)      | 1.4                     | 99.0% |
| 3) hsTnl+LoD                     | 0.58 | (0.57 - 0.6)  | 0.41   | (0.26 - 0.63)      | 1.4                     | 99.0% |
| 4) hsTnl+ADP                     | 0.54 | (0.53 - 0.55) | 0.41   | (0.26 - 0.63)      | 1.4                     | 99.6% |
| 5) hsTnl+LoD+ADP                 | 0.54 | (0.53 - 0.55) | 0.41   | (0.26 - 0.63)      | 1.4                     | 99.6% |
| 6) hsTnl+LoD+ADP+Direct rule-in  | 0.54 | (0.53 - 0.55) | 0.41   | (0.26 - 0.63)      | 1.4                     | 99.6% |

hsTnl=highly sensitive cardiac troponin I; LoD=limit of detection; ADP=accelerated diagnostic protocol.

**Table S10B. Short Stay Unit times per patient by strategy**

| SSU time, hours          | Mean | (95% CI)    | Median | (25th - 75th perc) | 90 <sup>th</sup> perc |
|--------------------------|------|-------------|--------|--------------------|-----------------------|
| 1) Standard              | 9.9  | (9.8 - 10)  | 7.54   | (0.0 - 20.8)       | 25.7                  |
| 2) hsTnl                 | 5.1  | (5.1 - 5.2) | 3.49   | (0.0 - 4.7)        | 21.2                  |
| 3) hsTnl+LoD             | 4.7  | (4.7 - 4.8) | 3.31   | (0.0 - 4.5)        | 20.7                  |
| 4) hsTnl+ADP             | 2.4  | (2.3 - 2.4) | 2.06   | (0.0 - 2.6)        | 3.8                   |
| 5) hsTnl+LoD+ADP         | 2.2  | (2.2 - 2.3) | 1.99   | (0.0 - 2.6)        | 3.8                   |
| 6) hsTnl+LoD+ADP+Rule in | 2.2  | (2.2 - 2.3) | 1.99   | (0.0 - 2.6)        | 3.8                   |

hsTnl=highly sensitive cardiac troponin I; LoD=limit of detection; ADP=accelerated diagnostic protocol.

**Figure S1. Risk stratification and process of care for possible acute coronary syndrome**

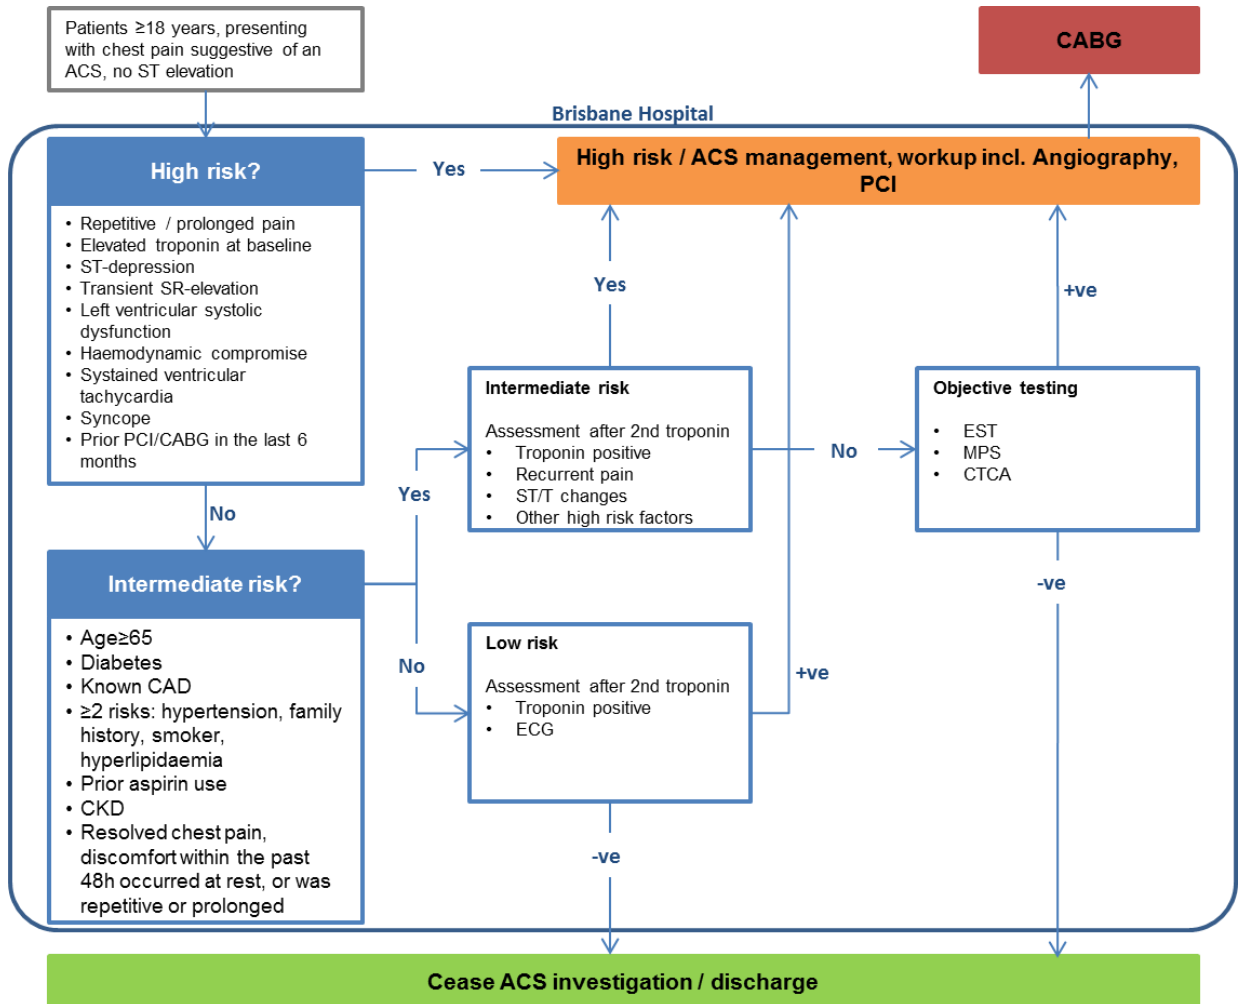

Risk stratification according to [3].

**Figure S2A-B. Comparison of actual vs. predicted costs**

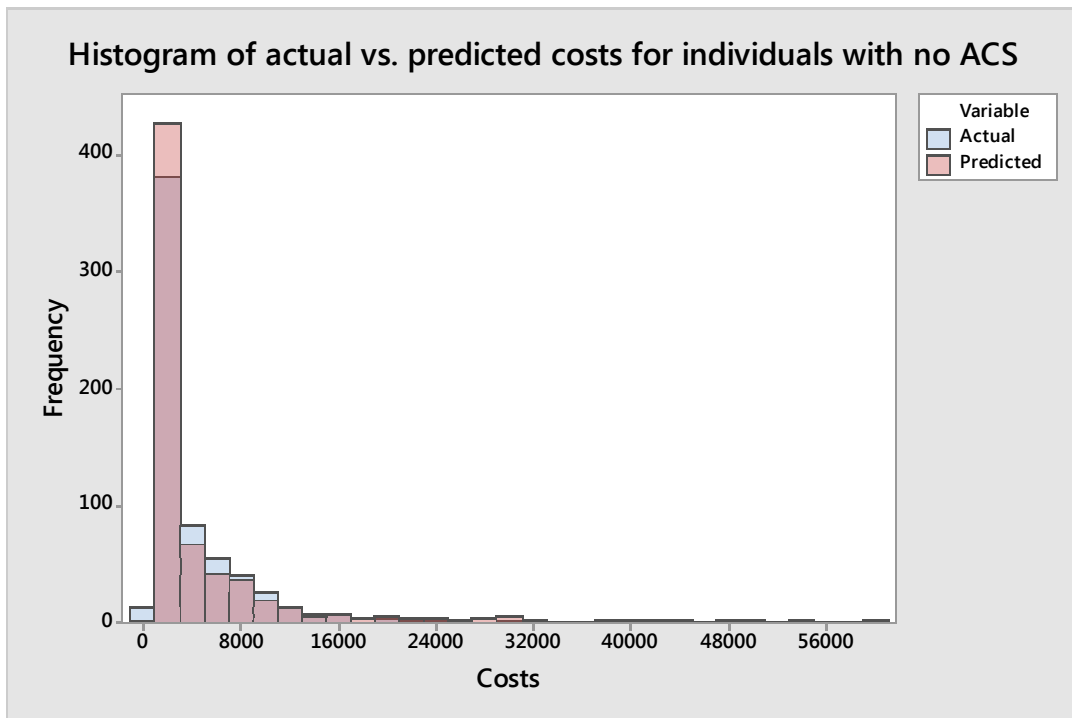

Data based on individuals with a final diagnosis of Non-ACS (640/719); p-value for Mean: 0.97

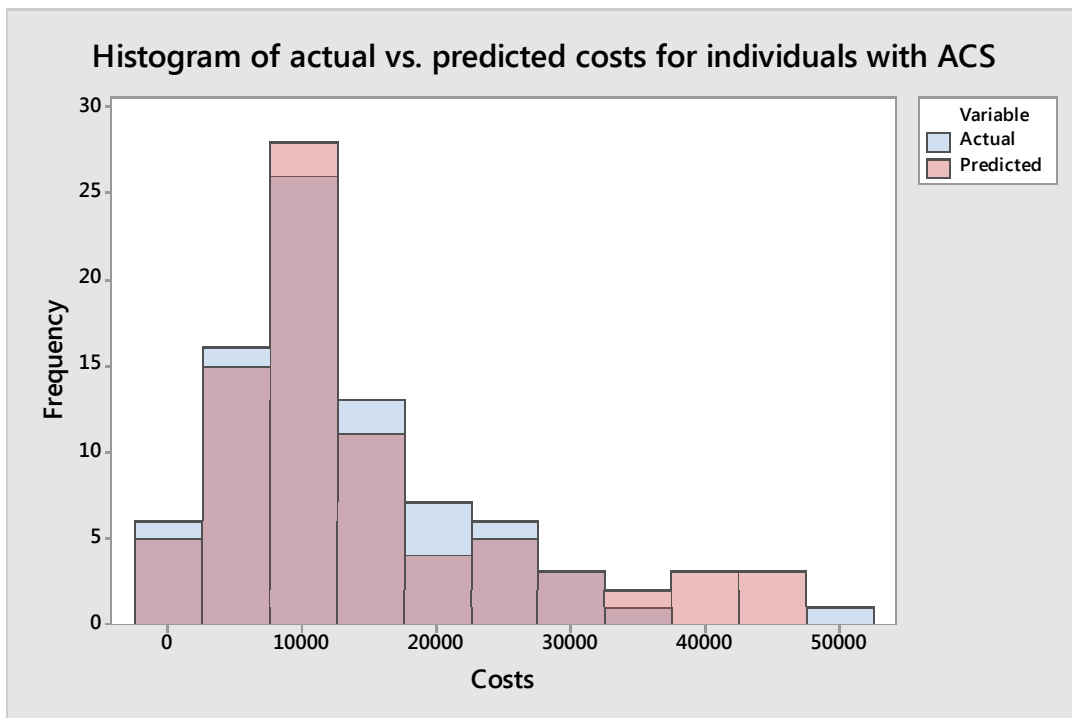

Data based on individuals with a final diagnosis of ACS (79/719); p-value for Mean: 0.39

**Figure S3. Simulated troponin protocol times (A), patient arrival times, and times of final results for sensitive troponin I and highly sensitive troponin I (B).**

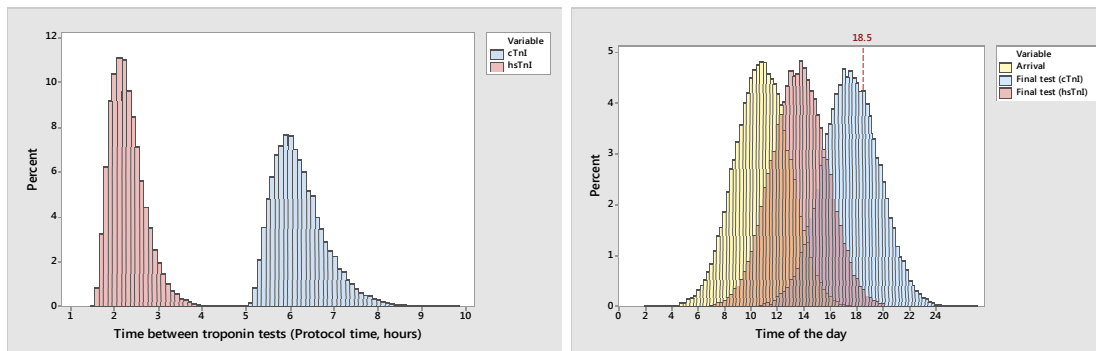

cTnI=sensitive cardiac troponin; hsTnI=highly sensitive cardiac troponin I

**Figure S4A-C. Histograms of Short Stay Unit times for different strategies**

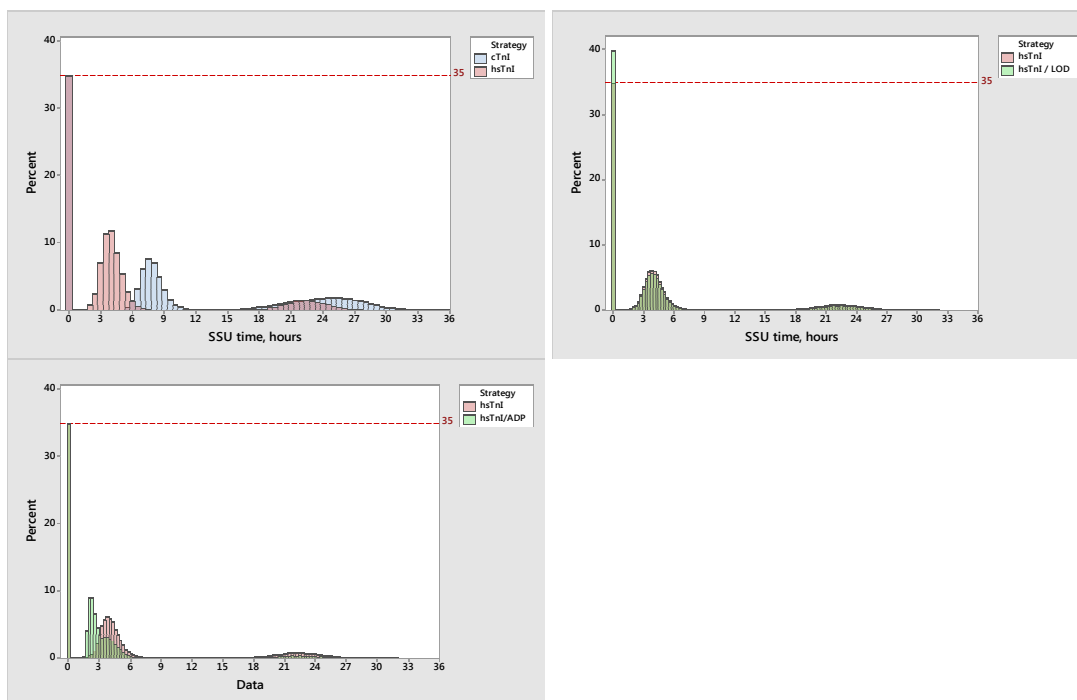

A: Standard strategy (cTnI) vs. hsTnI;

B: hsTnI strategy vs. hsTnI / LoD strategy; C: hsTnI strategy vs. hsTnI / ADP strategy.

The reference line at 35% indicates the proportion of patients that were not admitted to Short Stay Unit in the standard strategy.

hsTnI=highly sensitive cardiac troponin I; LoD=limit of detection; ADP=accelerated diagnostic protocol.

**Figure S5. Incremental cost and effectiveness of Strategy 2 (hsTnl) vs. Strategy 1 (cTnl, usual care)**

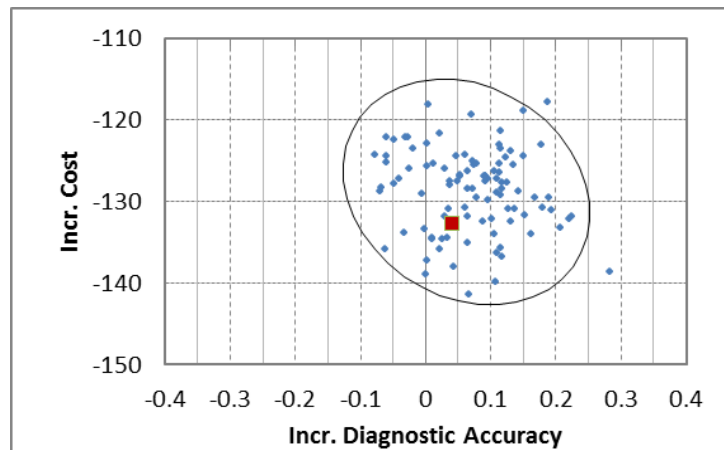

Results from multiple runs in a probabilistic sensitivity analysis (n=250). Each point represents results of a run with 40,000 sampled patients. The ellipse reflects the 95% confidence interval. Red box represents the result from the micro simulation.

**Table S11. Comparison of results from single and multiple run micro simulations**

| Strategy | Analysis | Total costs |               | Referral Accuracy, % |                 | Diagnostic Accuracy |                 |
|----------|----------|-------------|---------------|----------------------|-----------------|---------------------|-----------------|
|          |          | A\$         | (95%CI)       | Mean                 | (95%CI)         | Mean                | (95%CI)         |
| Standard | MS       | 3267        | (3236 - 3297) | 71.8                 | (71.4 - 72.2)   | 90.00               | (89.7 - 90.3)   |
|          | PSA      | 3253        | (3251 - 3255) | 72.0                 | (71.97 - 72.02) | 90.21               | (90.2 - 90.23)  |
| hsTnl    | MS       | 3134        | (3103 - 3165) | 72.8                 | (72.3 - 73.2)   | 90.04               | (89.7 - 90.3)   |
|          | PSA      | 3124        | (3122 - 3126) | 73.0                 | (72.95 - 73.00) | 90.3                | (90.26 - 90.29) |

MS: Micro simulation (n=1 runs)

PSA: Probabilistic sensitivity analysis (n=250 runs)



**Figure S6A. Mean costs based on number of samples in the micro simulation**

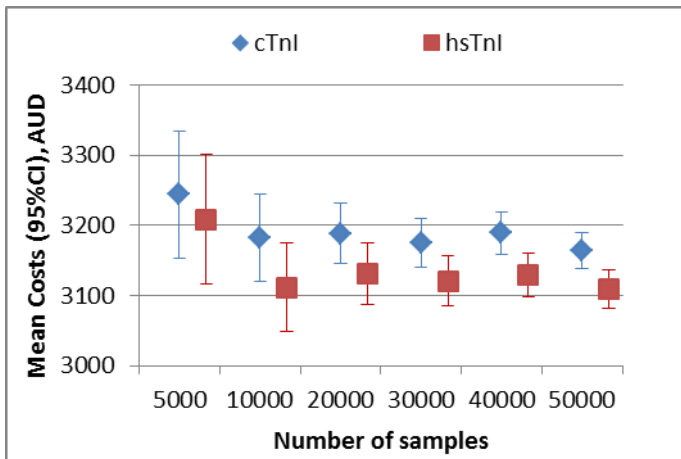

cTnI=sensitive cardiac troponin; hsTnI=highly sensitive cardiac troponin I

**Figure S6B. Incremental costs based on different number of samples in the micro simulation**

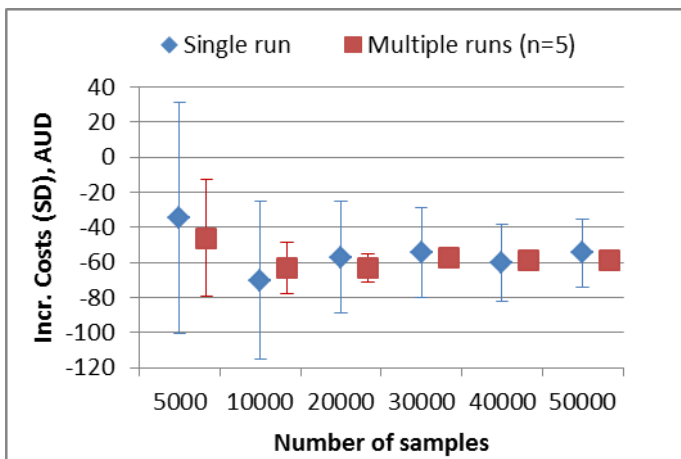

Incremental costs refer to Strategy-2 – Strategy 1

**Figure S7. Impact of protocol time on costs**

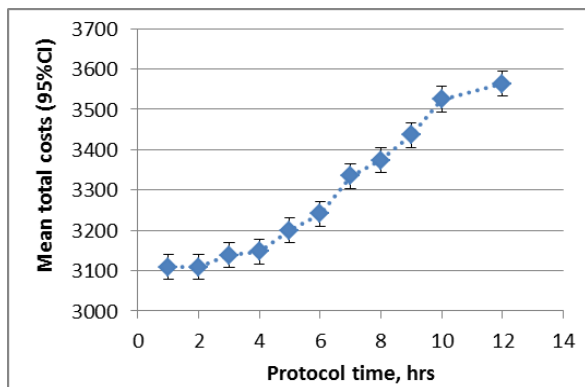

Analysis of strategy 2 (hsTnI) assuming constant troponin values and a fixed protocol time. Each data point represents the result of 5 independent runs with 40,000 patients per run.

**Figure S8. Impact of threshold time for discharge on costs**

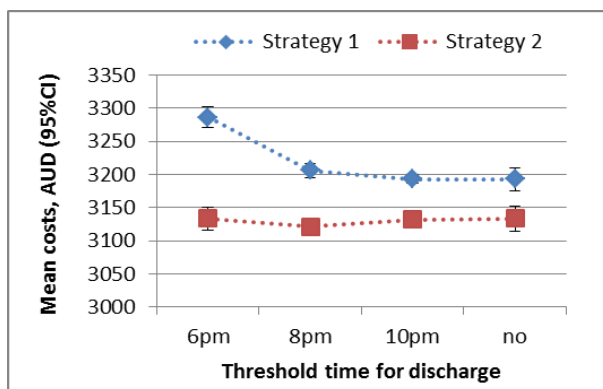

Each data point represents the result of 5 independent runs with 40,000 patients per run.

**Figure S9. Cost variation as a result of the sampling strategy illustrated for ten selected individuals**

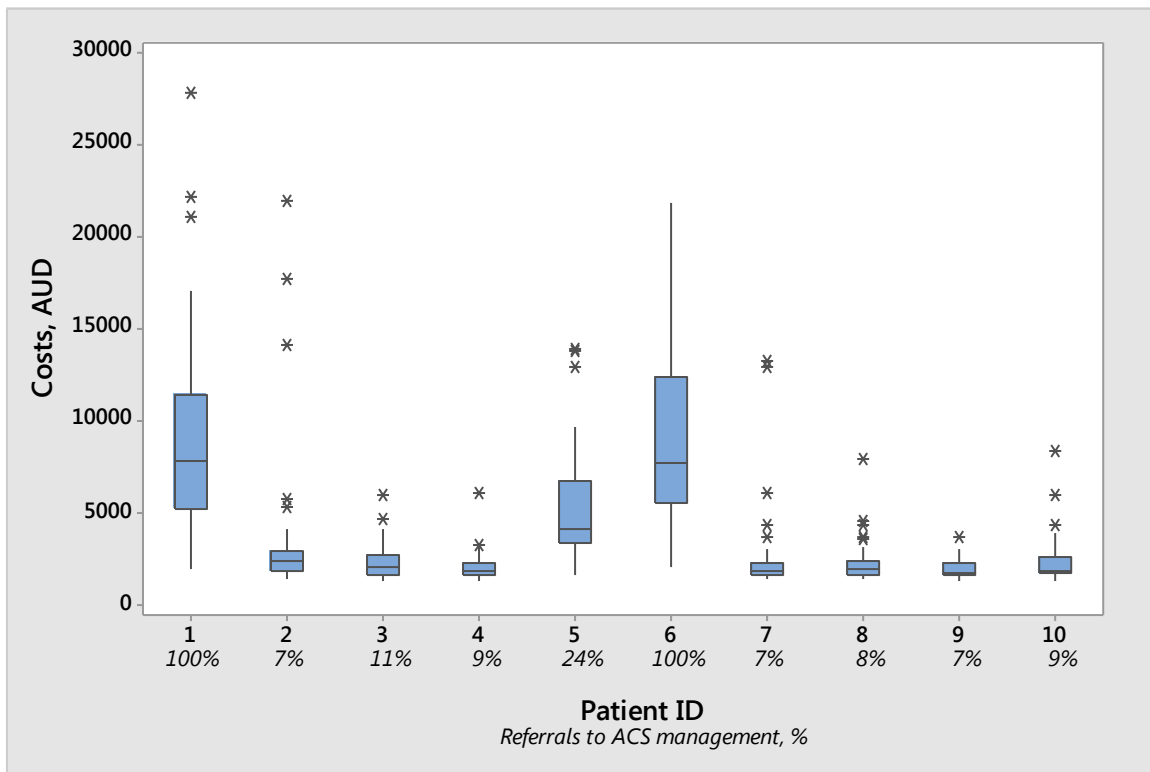

Box plots illustrate the variability in costs from multiple samples of the same individual as an example for the first 10 patients (Patient-ID 1 to 10).

By running 40,000 iterations, each of the 719 individuals was sampled on average 55 to 56 times (Range 36 – 78). This generated a huge cohort of patients that reflected variation and heterogeneity in decision making, severity, and management.

Each sample of an individual was consistent in age, sex, characteristics, ACS status and troponin values, but varied in terms of arrival time, protocol time, treatment times, additional cardiac testing if required, total inpatient LOS if referred for ACS management, and costs predictors. This resulted in a range of costs as demonstrated in the chart.

For individuals with non-ACS conditions, variation in subjective decision making or results from cardiac testing (exercise stress test or myocardial perfusion scan) led to admittance for ACS management in some cases (Patient ID 2-4, and 7-10). Italic numbers indicate the proportion of referrals to ACS management per patient. Patients with ACS were admitted for ACS management in 100% of iterations (Patient ID 1 and 6). Variation in costs between ACS patients was caused by sampling different LOS assumptions.

## References

1. Apple FS, Collinson PO. Analytical characteristics of high-sensitivity cardiac troponin assays. *Clin Chem* 2012;58(1):54-61.
2. Kavsak PA, MacRae AR, Yerna MJ, Jaffe AS. Analytic and clinical utility of a next-generation, highly sensitive cardiac troponin I assay for early detection of myocardial injury. *Clin Chem* 2009;55(3):573-577.
3. Acute Coronary Syndrome Guidelines Working Group. Guidelines for the management of acute coronary syndromes 2006. *Med J Aust.* 2006; 184(8): S1-S32.
4. Davis S, Stevenson M, Tappenden P, Wailloo A. NICE DSU Technical Support Document 15: Cost-effectiveness modelling using patient-level simulation. 2014. [http://www.nicedsu.org.uk/Patientlevel-simulation-TSD\(2892880\).htm](http://www.nicedsu.org.uk/Patientlevel-simulation-TSD(2892880).htm). Accessed October 6, 2015
5. Thokala P, Goodacre SW, Collinson PO, et al. Cost-effectiveness of presentation versus delayed troponin testing for acute myocardial infarction. *Heart.* 2012;98(20):1498-1503.
6. Westwood ME, van Asselt ADI, Ramaekers BLT, et al. High sensitivity troponin assays for the early rule-out or diagnosis of acute myocardial infarction in people with acute chest pain: a systematic review and cost-effectiveness analysis. A Diagnostic Assessment Report. *Health Technol. Assess.* 2015;19(44):1-234.
7. Goodacre S, Thokala P, Carroll C, et al. Systematic review, meta-analysis and economic modelling of diagnostic strategies for suspected acute coronary syndrome. *Health Technol. Assess.* 2013;17(1):v-vi, 1-188.
8. Vaidya A, Severens JL, Bongaerts BW, et al. High-sensitive troponin T assay for the diagnosis of acute myocardial infarction: an economic evaluation. *BMC Cardiovasc Disord.* 2014;14:77.
9. Canadian Agency for Drugs and Technologies in Health. High-Sensitivity cardiac troponin for the rapid diagnosis of acute coronary syndrome in the emergency department: a clinical and cost-effectiveness evaluation. 2013:[https://www.cadth.ca/media/pdf/OP0511\\_Troponin\\_ScienceReport\\_e.pdf](https://www.cadth.ca/media/pdf/OP0511_Troponin_ScienceReport_e.pdf). Accessed September 12, 2015.
